# Supplementary material
Source: publisher site journal article supplement (https://www.dovepress.com/get_supplementary_file.php?f=401474.docx)
Supplement: Supplementary file 1 [file get_supplementary_file.php]

**Appendix 1: Condition Classification and Rationale**

| HCC | Rationale for Classification |
| --- | --- |
| **Treatable** | |
| Breast, prostate, other cancers/tumors | Cancer is not preventable, but early treatment plans are required to stop it from growing. Some may grow slowly while others are aggressive, resulting in various treatment options.1 |
| Ischemic/unspecified stroke | Although strokes may be prevented through a healthy lifestyle, they are unpredictable, making them impossible to prevent once already at risk. However, early treatment can prevent brain damage and other symptoms. Unfortunately, if not fatal, recovering from strokes is relatively common, and long-term complications depend on the severity.2 |
| **Treatable and Preventable** | |
| Diabetes with chronic complications | There is no cure for diabetes, but complications can be prevented with medication or surgery. Steps that should be taken to prevent and treat complications due to diabetes are as follows: Controlling blood glucose levels, eating correctly, exercising often, and taking specific diabetic medications. Chronic complications are only lifelong if action is not taken to address them.3 |
| Pressure ulcer of skin with partial/full thickness skin loss | Pressure ulcers can be prevented through early identification, treatment, and close monitoring. Identifying the ulcer in the early stages is crucial to preventing further growth. In addition, providers will recommend a specific cleanser, medication, or surgery for partial skin loss. Full-thickness skin loss requires relieving pressure, debridement, and cleaning with a recovery time of up to four months.4 |
| **Treatable, Preventable, and Lifetime** | |
| Chronic Kidney Disease (Stage 5) | Stage 5 Chronic Kidney Disease is when the kidneys are nearing failure or have already failed, which can be prevented through immediate treatment in stages 1-4. However, the disease will continue to progress in some situations. Once Kidney disease enters this stage, treatment options are limited, and dialysis or a kidney transplant are necessary for survival. Lifetime complications are guaranteed, and treatment options can only relieve symptoms. The damage done to kidney function is irreversible at this stage.5 |
| Diabetes with Acute complications | Diabetes cannot be cured, but lifetime glucose and insulin monitoring are required. In addition, medication and a healthy lifestyle may help ease symptoms. Acute complications are unpredictable but usually do not severely affect the quality of life for patients.6 |
| **Treatable and Lifetime** | |
| Traumatic amputations and complications | Amputations are not preventable as they are required to save lives during traumatic events. The most important complications are bleeding, shock, and infection. Most significant complications are short-term, but lifetime attention is required to ease symptoms. The extent of lifetime treatment depends on the severity of amputation and limb removal.7 |
| Diabetes without complication | Diabetes without complication is not curable or preventable but can be maintained with proper glucose and insulin regulation. The best treatment to limit complications is living a healthy lifestyle with frequent physician visits.6 |
| **Lifetime** | |
| Rheumatoid arthritis and inflammatory connective tissue disease | Rheumatoid arthritis is not curable or preventable as it is an autoimmune condition. Treatment is available, but only to ease symptoms. These options include medication, corticosteroid injections, and surgery. Many patients with this condition require joint arthroplasty at some point in their lives.8 |

______________________
Table References:

Mayo Clinic. (2021, April 27). *Cancer—Symptoms, and causes*. <https://www.mayoclinic.org/diseases-conditions/cancer/symptoms-causes/syc-20370588>

2 Mayo Clinic. (2022, January 20). *Stroke—Symptoms and causes*. <https://www.mayoclinic.org/diseases-conditions/stroke/symptoms-causes/syc-20350113>

3Cleveland Clinic. (2021, March 28). Diabetes: Types, Risk Factors, Symptoms, Tests, Treatments & Prevention. <https://my.clevelandclinic.org/health/diseases/7104-diabetes-mellitus-an-overview>

4 Fathi, R., & Zieve, D. (2020, April 10). *Preventing pressure ulcers: MedlinePlus Medical Encyclopedia*. Medline Plus. <https://medlineplus.gov/ency/patientinstructions/000147.htm>

5 Mayo Clinic. (2021, October 12). *End-stage renal disease—Symptoms and causes*. <https://www.mayoclinic.org/diseases-conditions/end-stage-renal-disease/symptoms-causes/syc-20354532>

6 Mayo Clinic. (2022, August 9). *Diabetes—Symptoms, and causes*. <https://www.mayoclinic.org/diseases-conditions/diabetes/symptoms-causes/syc-20371444>

7 Shores, J. (2021, August 8). *Amputation*. Johns Hopkins Medicine. <https://www.hopkinsmedicine.org/health/treatment-tests-and-therapies/amputation>

8 Gary M. Owens, M. D. (2014). Managed Care Implications in Managing Rheumatoid Arthritis. *Supplements and Featured Publications*, *20*(7 Suppl). <https://www.ajmc.com/view/ace017_may14_ra-ce_owens_s145tos152>

**Appendix 2: Beneficiary Conditions and Classifications**

|  |  | Treatable | Septicemia, Sepsis, Systemic Inflammatory Response Syndrome/Shock |
| --- | --- | --- | --- |
| Lifetime |  |  | Metastatic Cancer and Acute Leukemia |
|  | Preventable | Treatable | Diabetes with Chronic Complications |
|  |  | Treatable | Protein-Calorie Malnutrition |
|  | Preventable | Treatable | Morbid Obesity |
| Lifetime |  |  | Disorders of Immunity |
| Lifetime |  |  | Coagulation Defects and Other Specified Hematological Disorders |
| Lifetime |  | Treatable | Dementia Without Complication |
| Lifetime |  |  | Major Depressive, Bipolar, and Paranoid Disorders |
|  | Preventable | | Polyneuropathy |
|  |  | Treatable | Respirator Dependence/Tracheostomy Status |
|  |  | Treatable | Cardio-Respiratory Failure and Shock |
| Lifetime | Preventable | Treatable | Congestive Heart Failure |
|  | Preventable | Treatable | Specified Heart Arrhythmias |
| Lifetime |  |  | Hemiplegia/Hemiparesis |
|  |  | Treatable | Vascular Disease with Complications |
| Lifetime |  | Treatable | Vascular Disease |
| Lifetime |  |  | Chronic Obstructive Pulmonary Disease |
|  |  | Treatable | Aspiration and Specified Bacterial Pneumonias |
|  |  | Treatable | Acute Renal Failure |
| Lifetime | Preventable | Treatable | Pressure Ulcer of Skin with Necrosis Through to Muscle, Tendon, or Bone |
|  | Preventable | Treatable | Pressure Ulcer of Skin with Full Thickness Skin Loss |
|  | Preventable | Treatable | Pressure Ulcer of Skin with Partial Thickness Skin Loss |
|  | Preventable | Treatable | Pressure Pre-Ulcer Skin Changes or Unspecified Stage |
|  | Preventable | Treatable | Complications of Specified Implanted Device or Graft |
|  |  | Treatable | Artificial Openings for Feeding or Elimination |
